# Supplementary material
Source: publisher figshare collection journal article supplement (https://gsajournals.figshare.com/articles/dataset/_/13238942)
Supplement: Supplementary file 1 [file 1]

## Sheet: Sheet1
Flybase ID	Annotation Symbol	Gene Name	Gene Symbol	Source	Stock #	Trip #	Genotype	Vector	Chrom-osome	Hairpin	PCR % Transcript Remaining (Sopko et al., 2014)	Starvation-Induced Mid-Oogenesis Phenotype	Comments on Starvation-Induced Phenotype	Starvation Phenotype Confirmed by 2nd Fly Line	Conditioned/ Developmental Clearance Phenotype	Comments on Conditioned Phenotype	Conditioned Phenotype Confirmed by 2nd Fly Line	Reference
FBgn0035039	CG3608	aarF domain containing kinase	Adck	BDSC	42841	HMS02533	y[1] sc[*] v[1] sev[21]; P{y[+t7.7] v[+t1.8]=TRiP.HMS02533}attP40	VALIUM20	2	attP40	0.02	None		Not Tested	None		Not Tested	This Study
FBgn0000017	CG4032	Abl tyrosine kinase	Abl	BDSC	28325	JF02960	y1 v1; P{TRiP.JF02960}attP2	VALIUM10	3	attP2	N/A	None		Not Tested	None		Not Tested	This Study
FBgn0028484	CG14992	Activated Cdc42 kinase	Ack	BDSC	33899	HMS00839	y1 sc* v1; P{TRiP.HMS00839}attP2	VALIUM20	3	attP2	0.38	None		No	None		No	This Study
FBgn0028484	CG14992	Activated Cdc42 kinase	Ack	BDSC	27652	JF02729	y1 v1; P{TRiP.JF02729}attP2	VALIUM10	3	attP2	N/A	None		No	None		No	This Study
FBgn0028484	CG14992	Activated Cdc42 kinase	Ack	BDSC	33941	HMS00892	y1 sc* v1; P{TRiP.HMS00892}attP2/TM3, Sb1	VALIUM20	3	attP2	0.71	Weak engulfment defects		No	Weak PN		No	This Study
FBgn0263998	CG43741	Activated Cdc42 kinase-like	Ack-like	BDSC	28694	JF03110	y1 v1; P{TRiP.JF03110}attP2	VALIUM10	3	attP2	N/A	None		Yes	Weak PN		Yes	This Study
FBgn0263998	CG43741	Activated Cdc42 kinase-like	Ack-like	BDSC	41931	HMS02328	y1 v1; P{TRiP.HMS02328}attP40	VALIUM20	2	attP40	N/A	None		Yes	Moderate PN		Yes	This Study
FBgn0036337	CG11255	Adenosine Kinase	AdenoK	BDSC	64491	HMC05509	y[1] v[1]; P{y[+t7.7] v[+t1.8]=TRiP.HMC05509}attP40	VALIUM20	2	attP40	N/A	Weak engulfment defects		Not Tested	Weak PN		Not Tested	This Study
FBgn0283494	CG3140	Adenylate kinase 2	Adk2	BDSC	55320	HMC04007	y[1] v[1]; P{y[+t7.7] v[+t1.8]=TRiP.HMC04007}attP40	VALIUM20	2	attP40	N/A	None		Not Tested	None		Not Tested	This Study
FBgn0010379	CG4006	Akt1	Akt1	BDSC	31701	HM04007	y1 v1; P{TRiP.HM04007}attP2	VALIUM1	3	attP2	N/A	None		Not Tested	None		Not Tested	This Study
FBgn0260972	CG8057	alicorn	alc	BDSC	33429	HMS00316	y1 sc* v1; P{TRiP.HMS00316}attP2	VALIUM20	3	attP2	0.4	None		Not Tested	None		Not Tested	This Study
FBgn0023169	CG3051	AMP-activated protein kinase alpha subunit	AMPKalpha	BDSC	32371	HMS00362	y[1] sc[*] v[1]; P{y[+t7.7] v[+t1.8]=TRiP.HMS00362}attP2	VALIUM20	3	attP2	N/A	None		Not Tested	None		Not Tested	This Study
FBgn0040505	CG8250	Anaplastic lymphoma kinase	Alk	BDSC	27518	JF02668	y1 v1; P{TRiP.JF02668}attP2	VALIUM10	3	attP2	N/A	None		Not Tested	None		Not Tested	This Study
FBgn0014006	CG4720	Apoptotic signal-regulating kinase 1	Ask1	BDSC	32464	HMS00464	y1 sc* v1; P{TRiP.HMS00464}attP2	VALIUM20	3	attP2	0.06	Engulfment defects	Variable: normal engulfment, engulfment defective, undead, round egg chambers, excessive mid-stage death in conditioned flies	Not Tested	None	Short DAs	Not Tested	This Study
FBgn0000116	CG32031	Arginine kinase	Argk	BDSC	41697	HMS02262	y1 sc* v1; P{TRiP.HMS02262}attP2	VALIUM20	3	attP2	0.01	Weak engulfment defects		Yes	None		Yes	This Study
FBgn0000116	CG32031	Arginine kinase	Argk	BDSC	31959	JF02699	y1 v1; P{TRiP.JF02699}attP2/TM3, Sb1	VALIUM10	3	attP2	N/A	Strong engulfment defects		Yes	None		Yes	This Study
FBgn0261854	CG42783	atypical protein kinase C	aPKC	BDSC	34332	HMS01320	y1 sc* v1; P{TRiP.HMS01320}attP2	VALIUM20	3	attP2	N/A	Engulfment defects	Stage 6-10 egg chambers missing middle follicle cells	Yes	None	Stage 6-10 egg chambers missing middle follicle cells	No	This Study
FBgn0261854	CG42783	atypical protein kinase C	aPKC	BDSC	38245	HMS01689	y1 sc* v1; P{TRiP.HMS01689}attP40	VALIUM20	2	attP40	N/A	Weak engulfment defects		Yes	None		No	This Study
FBgn0261854	CG42783	atypical protein kinase C	aPKC	BDSC	25946	JF01966	y1 v1; P{TRiP.JF01966}attP2	VALIUM10	3	attP2	N/A	Weak engulfment defects		Yes	ND		Not Tested	This Study
FBgn0261854	CG42783	atypical protein kinase C	aPKC	BDSC	35001	HMS01411	y1 sc* v1; P{TRiP.HMS01411}attP2	VALIUM20	3	attP2	N/A	Strong engulfment defects		Yes	None		No	Meehan et al. 2015
FBgn0000147	CG3068	aurora A	aurA	BDSC	31704	HM04011	y1 v1; P{TRiP.HM04011}attP2	VALIUM1	3	attP2	N/A	None		Yes	None		Yes	This Study
FBgn0000147	CG3068	aurora A	aurA	BDSC	35763	HMS01511	y1 sc* v1; P{TRiP.HMS01511}attP40	VALIUM20	2	attP40	1	None		Yes	None		Yes	This Study
FBgn0000147	CG3068	aurora A	aurA	BDSC	41889	HMS02205	y1 sc* v1; P{TRiP.HMS02205}attP40	VALIUM20	2	attP40	0.06	None		Yes	None		Yes	This Study
FBgn0024227	CG6620	aurora B	aurB	BDSC	28691	JF03107	y1 v1; P{TRiP.JF03107}attP2	VALIUM10	3	attP2	N/A	None	Egg chambers are very round.	Not Tested	Weak PN	Egg chambers are very round. Short DAs	Not Tested	This Study
FBgn0260945	CG10967	Autophagy-related 1	Atg1	BDSC	26731	JF02273	y1 v1; P{TRiP.JF02273}attP2	VALIUM10	3	attP2	N/A	Weak engulfment defects		Not Tested	None		Not Tested	This Study
FBgn0037218	CG1107	auxilin	aux	BDSC	28509	JF03129	y1 v1; P{TRiP.JF03129}attP2	VALIUM10	3	attP2	N/A	None		Not Tested	None		Not Tested	This Study
FBgn0011300	CG8224	baboon	babo	BDSC	25933	JF01953	y1 v1; P{TRiP.JF01953}attP2	VALIUM10	3	attP2	N/A	None	Some disorganization during mid-stage death but engulfment itself appears normal	Not Tested	None		Not Tested	This Study
FBgn0027889	CG6386	ballchen	ball	BDSC	31350	JF01308	y1 v1; P{TRiP.JF01308}attP2	VALIUM1	3	attP2	N/A	None		Not Tested	None		Not Tested	This Study
FBgn0000229	CG5680	basket	bsk	BDSC	31323	JF01275	y1 v1; P{TRiP.JF01275}attP2	VALIUM1	3	attP2	N/A	Weak engulfment defects		Yes	Weak PN		No	Timmons Thesis
FBgn0000229	CG5680	basket	bsk	BDSC	31476	JF01274	y1 v1; P{TRiP.JF01274}attP2/TM3, Ser1	VALIUM1	3	attP2	N/A	Weak engulfment defects		Yes	None		No	Timmons Thesis
FBgn0005666	CG32019	bent	bt	BDSC	31546	JF01108	y1 v1; P{TRiP.JF01108}attP2	VALIUM1	3	attP2	N/A	None		No	None		Yes	This Study
FBgn0005666	CG32019	bent	bt	BDSC	31545	JF01107	y1 v1; P{TRiP.JF01107}attP2	VALIUM1	3	attP2	N/A	Weak engulfment defects		No	None		Yes	This Study
FBgn0285896	CG32134	breathless	btl	BDSC	40871	HMS02038	y1 sc* v1; P{TRiP.HMS02038}attP2	VALIUM20	3	attP2	N/A	None		Not Tested	None		Not Tested	This Study
FBgn0003502	CG8049	Btk family kinase at 29A	Btk29A	BDSC	25791	JF01797	y1 v1; P{TRiP.JF01797}attP2	VALIUM10	3	attP2	N/A	None		Not Tested	None		Not Tested	This Study
FBgn0031696	CG14030	Bub1 kinase	Bub1	BDSC	58185	HMJ22162	y[1] v[1]; P{y[+t7.7] v[+t1.8]=TRiP.HMJ22162}attP40	VALIUM20	2	attP40	N/A	None		Not Tested	None		Not Tested	This Study
FBgn0263855	CG7838	Bub1-related kinase	BubR1	BDSC	35700	GLV21065	y1 sc* v1; P{TRiP.GLV21065}attP2	VALIUM21	3	attP2	N/A	None		Not Tested	None		Not Tested	This Study
FBgn0262081	CG42317	C-terminal Src kinase	Csk	BDSC	41712	HMS02277	y1 v1; P{TRiP.HMS02277}attP40	VALIUM20	2	attP40	1	None		Not Tested	None		Not Tested	This Study
FBgn0022800	CG10244	Cadherin 96Ca	Cad96Ca	BDSC	27266	JF02579	y1 v1; P{TRiP.JF02579}attP2	VALIUM10	3	attP2	N/A	None		Not Tested	None		Not Tested	This Study
FBgn0016126	CG1495	Calcium/calmodulin-dependent protein kinase I	CaMKI	BDSC	26726	JF02268	y1 v1; P{TRiP.JF02268}attP2	VALIUM10	3	attP2	N/A	Weak engulfment defects		Not Tested	None		Not Tested	This Study
FBgn0264607	CG18069	Calcium/calmodulin-dependent protein kinase II	CaMKII	BDSC	29401	JF03336	y1 v1; P{TRiP.JF03336}attP2	VALIUM10	3	attP2	N/A	None		Not Tested	None		Not Tested	This Study
FBgn0015024	CG2028	Casein kinase Ialpha	CkIalpha	BDSC	41711	HMS02276	y1 v1; P{TRiP.HMS02276}attP40	VALIUM20	2	attP40	N/A	None		No	None	Some mid-stage death in conditioned	Yes	This Study
FBgn0015024	CG2028	Casein kinase Ialpha	CkIalpha	BDSC	25786	JF01792	y1 v1; P{TRiP.JF01792}attP2	VALIUM10	3	attP2	N/A	Strong engulfment defects		No	None	In conditioned flies, Excessive mid-stage death. Egg chambers did not progress to late stages	Yes	This Study
FBgn0000259	CG15224	Casein kinase II beta subunit	CkIIbeta	BDSC	34939	HMS00058	y1 sc* v1; P{TRiP.HMS00058}attP2	VALIUM20	3	attP2	N/A	None		No	None		No	This Study
FBgn0000259	CG15224	Casein kinase II beta subunit	CkIIbeta	BDSC	31254	N/A	y1 v1; P{TRiP.JF01195}attP2	VALIUM10	3	attP2	N/A	Weak engulfment defects		No	None		No	This Study
FBgn0000259	CG15224	Casein kinase II beta subunit	CkIIbeta	BDSC	42943	HMS02636	y[1] sc[*] v[1]; P{y[+t7.7] v[+t1.8]=TRiP.HMS02636}attP40	VALIUM20	2	attP40	N/A	ND		Not Tested	Moderate PN		No	This Study
FBgn0264492	CG17520	casein kinase IIalpha	CkIIalpha	BDSC	31645	JF01436	y1 v1; P{TRiP.JF01436}attP2	VALIUM1	3	attP2	N/A	None		Not Tested	None		Not Tested	This Study
FBgn0013759	CG6703	CASK	CASK	BDSC	32857	HMS00644	y1 sc* v1; P{TRiP.HMS00644}attP2	VALIUM20	3	attP2	1	Weak engulfment defects		Not Tested	None		Not Tested	This Study
FBgn0028360	CG32742	Cdc7 kinase	Cdc7	BDSC	57798	HMC04992	y[1] sc[*] v[1]; P{y[+t7.7] v[+t1.8]=TRiP.HMC04992}attP40	VALIUM20	2	attP40	N/A	None	mostly phase 2 and 3 of death	Not Tested	None		Not Tested	This Study
FBgn0027491	CG5387	Cdk5 activator-like protein	Cdk5alpha	BDSC	27048	JF02374	y1 v1; P{TRiP.JF02374}attP2	VALIUM10	3	attP2	N/A	A few had strong defects, most normal		Not Tested	None		Not Tested	This Study
FBgn0004876	CG6027	center divider	cdi	BDSC	42568	HMJ02227	y[1] v[1]; P{y[+t7.7] v[+t1.8]=TRiP.HMJ02227}attP40	VALIUM20	2	attP40	0.69	None		Not Tested	None		Not Tested	This Study
FBgn0034644	CG10082	CG10082	CG10082	BDSC	33717	HMS00598	y1 sc* v1; P{TRiP.HMS00598}attP2	VALIUM20	3	attP2	N/A	Weak engulfment defects		Yes	None	Excessive mid-stage death in conditioned flies	No	This Study
FBgn0034644	CG10082	CG10082	CG10082	BDSC	32431	HMS00427	y1 sc* v1; P{TRiP.HMS00427}attP2	VALIUM20	3	attP40	N/A	Weak engulfment defects		Yes	None		No	This Study
FBgn0039083	CG10177	CG10177	CG10177	BDSC	25945	JF01965	y1 v1; P{TRiP.JF01965}attP2	VALIUM10	3	attP2	N/A	Weak engulfment defects		Not Tested	None		Not Tested	This Study
FBgn0032752	CG10702	CG10702	CG10702	BDSC	42663	HMS02499	y1 sc* v1; P{TRiP.HMS02499}attP40	VALIUM20	2	attP40	N/A	None		Not Tested	None		Not Tested	This Study
FBgn0035397	CG11486	CG11486	CG11486	BDSC	42492	HMJ02056	y[1] v[1]; P{y[+t7.7] v[+t1.8]=TRiP.HMJ02056}attP40	VALIUM20	2	attP40	0.79	ND		Not Tested	Weak PN		Not Tested	This Study
FBgn0035436	CG12016	CG12016	CG12016	BDSC	60085	HMC05079	y[1] sc[*] v[1]; P{y[+t7.7] v[+t1.8]=TRiP.HMC05079}attP40	VALIUM20	2	attP40	N/A	ND		Not Tested	None		Not Tested	This Study
FBgn0039796	CG12069	CG12069	CG12069	BDSC	27677	JF02756	y1 v1; P{TRiP.JF02756}attP2	VALIUM10	3	attP2	N/A	None		Not Tested	None		Not Tested	This Study
FBgn0037325	CG12147	CG12147	CG12147	BDSC	42612	HMS02447	y[1] sc[*] v[1] sev[21]; P{y[+t7.7] v[+t1.8]=TRiP.HMS02447}attP2	VALIUM20	3	attP2	N/A	None		Not Tested	None		Not Tested	This Study
FBgn0027507	CG1344	CG1344	CG1344	BDSC	61907	HMJ23462	y[1] v[1]; P{y[+t7.7] v[+t1.8]=TRiP.HMJ23462}attP40	VALIUM20	2	attP40	N/A	None		Not Tested	None		Not Tested	This Study
FBgn0261387	CG17528	CG17528	CG17528	BDSC	42575	HMJ02234	y[1] v[1]; P{y[+t7.7] v[+t1.8]=TRiP.HMJ02234}attP40	VALIUM20	2	attP40	0.05	None		Yes	None		Yes	This Study
FBgn0261387	CG17528	CG17528	CG17528	BDSC	26292	JF02061	y1 v1; P{TRiP.JF02061}attP2	VALIUM10	3	attP2	N/A	None		Yes	None		Yes	This Study
FBgn0040056	CG17698	CG17698	CG17698	BDSC	35733	HMS01475	y1 sc* v1; P{TRiP.HMS01475}attP2	VALIUM20	3	attP2	0.25	None		Not Tested	None		Not Tested	This Study
FBgn0039623	CG1951	CG1951	CG1951	BDSC	58354	HMC04525	y[1] sc[*] v[1]; P{y[+t7.7] v[+t1.8]=TRiP.HMC04525}attP40	VALIUM20	2	attP40	N/A	ND		Not Tested	None		Not Tested	This Study
FBgn0032955	CG2201	CG2201	CG2201	BDSC	57752	HMC04945	y[1] sc[*] v[1]; P{y[+t7.7] v[+t1.8]=TRiP.HMC04945}attP40	VALIUM20	2	attP40	N/A	None		Not Tested	None		Not Tested	This Study
FBgn0039790	CG2246	CG2246	CG2246	BDSC	41694	HMS02259	y1 sc* v1; P{TRiP.HMS02259}attP2/TM3, Sb1	VALIUM20	3	attP2	N/A	None		Not Tested	None		Not Tested	This Study
FBgn0030384	CG2577	CG2577	CG2577	BDSC	33649	HMS00054	y1 sc* v1; P{TRiP.HMS00054}attP2	VALIUM20	3	attP2	N/A	None		Not Tested	Weak PN		Not Tested	This Study
FBgn0031643	CG3008	CG3008	CG3008	BDSC	31736	HM04045	y1 v1; P{TRiP.HM04045}attP2	VALIUM20	3	attP2	N/A	Weak engulfment defects		Not Tested	None		Not Tested	This Study
FBgn0051140	CG31140	CG31140	CG31140	BDSC	36746	HMS03006	y1 sc* v1; P{TRiP.HMS03006}attP2/TM3, Sb1	VALIUM20	3	attP2	N/A	None		Not Tested	None		Not Tested	This Study
FBgn0051643	CG31643	CG31643	CG31643	BDSC	53380	HMJ02237	y[1] v[1]; P{y[+t7.7] v[+t1.8]=TRiP.HMJ02237}attP40	VALIUM20	2	attP40	0.09	None		Not Tested	None		Not Tested	This Study
FBgn0052944	CG32944	CG32944	CG32944	BDSC	27290	JF02591	y1 v1; P{TRiP.JF02591}attP2	VALIUM10	3	attP2	N/A	None		Not Tested	None		Not Tested	This Study
FBgn0053156	CG33156	CG33156	CG33156	BDSC	62858	HMC05331	y[1] sc[*] v[1]; P{y[+t7.7] v[+t1.8]=TRiP.HMC05331}attP40	VALIUM20	2	attP40	N/A	None		Not Tested	None		Not Tested	This Study
FBgn0085386	CG34357	CG34357	CG34357	BDSC	28524	HM05010	y1 v1; P{TRiP.HM05010}attP2	VALIUM10	3	attP2	N/A	None		Not Tested	None		Not Tested	This Study
FBgn0259712	CG42366	CG42366	CG42366	BDSC	27294	JF02599	y1 v1; P{TRiP.JF02599}attP2	VALIUM10	3	attP2	N/A	None		Not Tested	None		Not Tested	This Study
FBgn0031299	CG4629	CG4629	CG4629	BDSC	27310	JF02618	y1 v1; P{TRiP.JF02618}attP2	VALIUM10	3	attP2	N/A	None		Not Tested	None		Not Tested	This Study
FBgn0032187	CG4839	CG4839	CG4839	BDSC	27046	JF02372	y1 v1; P{TRiP.JF02372}attP2	VALIUM10	3	attP2	N/A	None		Not Tested	None		Not Tested	This Study
FBgn0035957	CG5144	CG5144	CG5144	BDSC	32393	HMS00387	y1 sc* v1; P{TRiP.HMS00387}attP2/TM3, Sb1	VALIUM20	3	attP2	N/A	None		Not Tested	None		Not Tested	This Study
FBgn0034299	CG5757	CG5757	CG5757	BDSC	61828	HMJ23271	y[1] v[1]; P{y[+t7.7] v[+t1.8]=TRiP.HMJ23271}attP40	VALIUM20	2	attP40	N/A	None		Not Tested	None		Not Tested	This Study
FBgn0267390	CG6498	CG6498	CG6498	BDSC	44547	HMC02943	y[1] v[1]; P{y[+t7.7] v[+t1.8]=TRiP.HMC02943}attP40	VALIUM20	2	attP40	1	None		Not Tested	None		Not Tested	This Study
FBgn0027587	CG7028	CG7028	CG7028	BDSC	55640	HMC03788	y[1] sc[*] v[1]; P{y[+t7.7] v[+t1.8]=TRiP.HMC03788}attP40	VALIUM20	2	attP40	0.12	ND		Not Tested	None		Not Tested	This Study
FBgn0032650	CG7094	CG7094	CG7094	BDSC	42653	HMS02489	y[1] sc[*] v[1] sev[21]; P{y[+t7.7] v[+t1.8]=TRiP.HMS02489}attP2	VALIUM20	3	attP2	N/A	None		Not Tested	None		Not Tested	This Study
FBgn0038588	CG7156	CG7156	CG7156	BDSC	58101	HMJ22016	y[1] v[1]; P{y[+t7.7] v[+t1.8]=TRiP.HMJ22016}attP40	VALIUM20	2	attP40	N/A	Strong engulfment defects	Some normal midstage death, some undead, late-stage egg chambers had a range of phenotypes from missing posterior FCs to complete destruction of the egg chamber, some dumpless, stage 14s had disorganized FCs, some phase 4/5 degenerating egg chambers had whole NC nuclei, malformed DAs	Yes	ND		Not Tested
FBgn0038588	CG7156	CG7156	CG7156	BDSC	39063	HMS01983	y1 sc* v1; P{TRiP.HMS01983}attP40	VALIUM20	2	attP40	0.07	Engulfment defects	Most normal, a few had pyknotic FC nuclei and no membrane	Yes	None		Not Tested	This Study
FBgn0031730	CG7236	CG7236	CG7236	BDSC	27505	JF02655	y1 v1; P{TRiP.JF02655}attP2	VALIUM10	3	attP2	N/A	None		Not Tested	None		Not Tested	This Study
FBgn0038258	CG7362	CG7362	CG7362	BDSC	32450	HMS00449	y1 sc* v1; P{TRiP.HMS00449}attP2	VALIUM20	3	attP2	N/A	None		Not Tested	ND		Not Tested	This Study
FBgn0030087	CG7766	CG7766	CG7766	BDSC	42890	HMS02583	y[1] sc[*] v[1] sev[21]; P{y[+t7.7] v[+t1.8]=TRiP.HMS02583}attP40	VALIUM20	2	attP2	N/A	None		No	Moderate PN		Yes
FBgn0030087	CG7766	CG7766	CG7766	BDSC	42510	HMJ02075	y[1] v[1]; P{y[+t7.7] v[+t1.8]=TRiP.HMJ02075}attP40	VALIUM20	2	attP40	N/A	Engulfment defects	Undead	No	Weak PN		Yes	This Study
FBgn0030864	CG8173	CG8173	CG8173	BDSC	31586	JF01161	y1 v1; P{TRiP.JF01161}attP2	VALIUM1	3	attP2	N/A	None		Not Tested	None		Not Tested	This Study
FBgn0033673	CG8298	CG8298	CG8298	BDSC	34524	HMS00813	y[1] sc[*] v[1]; P{y[+t7.7] v[+t1.8]=TRiP.HMS00813}attP2	VALIUM20	3	attP2	N/A	None		Not Tested	None		Not Tested	This Study
FBgn0033915	CG8485	CG8485	CG8485	BDSC	60083	HMC05077	y[1] sc[*] v[1]; P{y[+t7.7] v[+t1.8]=TRiP.HMC05077}attP40	VALIUM20	2	attP40	N/A	None		Not Tested	None		Not Tested	This Study
FBgn0033244	CG8726	CG8726	CG8726	BDSC	57230	HMC04614	y[1] sc[*] v[1]; P{y[+t7.7] v[+t1.8]=TRiP.HMC04614}attP40	VALIUM20	2	attP40	N/A	None		Not Tested	None		Not Tested	This Study
FBgn0027504	CG8878	CG8878	CG8878	BDSC	57573	HMC04523	y[1] sc[*] v[1]; P{y[+t7.7] v[+t1.8]=TRiP.HMC04523}attP40	VALIUM20	2	attP40	0.15	None		Not Tested	None		Not Tested	This Study
FBgn0022936	CG7405	Cyclin H	CycH	BDSC	34732	HMS01212	y1 sc* v1; P{TRiP.HMS01212}attP2	VALIUM20	3	attP2	N/A	None		Not Tested	None		Not Tested	This Study
FBgn0025455	CG6292	Cyclin T	CycT	BDSC	32976	HMS00776	y1 sc* v1; P{TRiP.HMS00776}attP2	VALIUM20	3	attP2	N/A	Weak engulfment defects		No	Moderate PN	Short DAs	No	This Study
FBgn0025455	CG6292	Cyclin T	CycT	BDSC	31762	HM04074	y1 v1; P{TRiP.HM04074}attP2	VALIUM1	3	attP2	N/A	None		No	None		No	This Study
FBgn0004106	CG5363	Cyclin-dependent kinase 1	Cdk1	BDSC	36117	HMS01531	y1 sc* v1; P{TRiP.HMS01531}attP40	VALIUM20	2	attP40	N/A	Engulfment defects	few mid stage egg chambers, severe defects in stage 6 egg chambers	Yes	None		No	This Study
FBgn0004106	CG5363	Cyclin-dependent kinase 1	Cdk1	BDSC	28368	JF03004	y1 v1; P{TRiP.JF03004}attP2	VALIUM10	3	attP2	N/A	Weak engulfment defects		Yes	None		No	This Study
FBgn0004106	CG5363	Cyclin-dependent kinase 1	Cdk1	BDSC	40950	HMS02212	y1 sc* v1; P{TRiP.HMS02212}attP2	VALIUM20	3	attP40	N/A	Weak engulfment defects		Yes	Weak PN		No	This Study
FBgn0037093	CG7597	Cyclin-dependent kinase 12	Cdk12	BDSC	34838	HMS00155	y1 sc* v1; P{TRiP.HMS00155}attP2	VALIUM20	3	attP2	N/A	None		Not Tested	None		Not Tested	This Study
FBgn0004107	CG10498	Cyclin-dependent kinase 2	Cdk2	BDSC	36128	HMS01543	y1 sc* v1; P{TRiP.HMS01543}attP40	VALIUM20	2	attP40	N/A	Weak engulfment defects		Yes	Weak PN		Yes	This Study
FBgn0004107	CG10498	Cyclin-dependent kinase 2	Cdk2	BDSC	34856	HMS00174	y1 sc* v1; P{TRiP.HMS00174}attP2/TM3, Sb1	VALIUM20	3	attP2	N/A	Weak engulfment defects		Yes	Moderate PN	Short DAs	Yes	This Study
FBgn0016131	CG5072	Cyclin-dependent kinase 4	Cdk4	BDSC	27714	JF02795	y1 v1; P{TRiP.JF02795}attP2	VALIUM10	3	attP2	N/A	None		Not Tested	None		Not Tested	This Study
FBgn0013762	CG8203	Cyclin-dependent kinase 5	Cdk5	BDSC	27517	JF02667	y1 v1; P{TRiP.JF02667}attP2	VALIUM10	3	attP2	N/A	None		Not Tested	None		Not Tested	This Study
FBgn0263237	CG3319	Cyclin-dependent kinase 7	Cdk7	BDSC	57245	HMC04632	y[1] sc[*] v[1]; P{y[+t7.7] v[+t1.8]=TRiP.HMC04632}attP40	VALIUM20	2	attP40	N/A	None		Not Tested	None		Not Tested	This Study
FBgn0019949	CG5179	Cyclin-dependent kinase 9	Cdk9	BDSC	34982	HMS01391	y1 sc* v1; P{TRiP.HMS01391}attP2	VALIUM20	3	attP2	N/A	Engulfment defects	No membrane enlargement, no germline engulfment or vesicles.	No	Very strong PN	As oogenesis progresses, egg chambers lose FC. NC nuclei condense, but persist and there are floating NC	No	This Study
FBgn0019949	CG5179	Cyclin-dependent kinase 9	Cdk9	BDSC	41932	HMS02329	y1 v1; P{TRiP.HMS02329}attP40/CyO	VALIUM20	2	attP40	0.44	None		No	None		No	This Study
FBgn0052666	CG32666	Death-associated protein kinase related	Drak	BDSC	29449	JF03385	y1 v1; P{TRiP.JF03385}attP2	VALIUM10	3	attP2	N/A	None		Not Tested	None		Not Tested	This Study
FBgn0015380	CG17348	derailed	drl	BDSC	29602	JF03281	y1 v1; P{TRiP.JF03281}attP2	VALIUM10	3	attP2	N/A	None		Not Tested	None		Not Tested	This Study
FBgn0033791	CG3915	Derailed 2	Drl-2	BDSC	25961	JF01981	y1 v1; P{TRiP.JF01981}attP2	VALIUM10	3	attP2	N/A	None		Not Tested	None		Not Tested	This Study
FBgn0085390	CG34361	Diacyl glycerol kinase	Dgk	BDSC	29459	JF03396	y1 v1; P{TRiP.JF03396}attP2	VALIUM10	3	attP2	N/A	None		No	Weak PN		Yes	This Study
FBgn0085390	CG34361	Diacyl glycerol kinase	Dgk	BDSC	41944	HMS02341	y1 sc* v1; P{TRiP.HMS02341}attP40	VALIUM1	2	attP2	N/A	Weak engulfment defects		Yes	Weak PN		Yes	This Study
FBgn0085390	CG34361	Diacyl glycerol kinase	Dgk	BDSC	36745	HMS03005	y1 sc* v1; P{TRiP.HMS03005}attP2	VALIUM20	3	attP2	N/A	Weak engulfment defects		Yes	None		No	This Study
FBgn0001624	CG1725	discs large 1	dlg1	BDSC	25780	JF01365	y1 v1; P{TRiP.JF01365}attP2	VALIUM10	3	attP2	N/A	Weak engulfment defects		Not Tested	None		Not Tested	This Study
FBgn0002413	CG2048	discs overgrown	dco	BDSC	27719	JF02800	y1 v1; P{TRiP.JF02800}attP2	VALIUM10	3	attP2	N/A	None		Not Tested	None		Not Tested	This Study
FBgn0010269	CG15793	Downstream of raf1	Dsor1	BDSC	31184	JF01697	y1 v1; P{TRiP.JF01697}attP2	VALIUM1	3	attP2	N/A	Weak engulfment defects		Yes	Yes	Some dumpless, No DA	Yes	This Study
FBgn0010269	CG15793	Downstream of raf1	Dsor1	BDSC	33639	HMS00037	y1 v1; P{TRiP.HMS00037}attP2	VALIUM20	3	attP2	N/A	None		Yes	Yes		Yes	This Study
FBgn0010269	CG15793	Downstream of raf1	Dsor1	BDSC	34830	HMS00145	y1 sc* v1; P{TRiP.HMS00145}attP2	VALIUM20	3	attP2	0.36	None		Yes	Yes	Some dumpless, No DA	Yes	This Study
FBgn0010269	CG15793	Downstream of raf1	Dsor1	BDSC	32920	HMS00710	y1 sc* v1; P{TRiP.HMS00710}attP2/TM3, Sb1	VALIUM20	3	attP2	N/A	Weak engulfment defects		Yes	Moderate PN	Short DAs	Yes	This Study
FBgn0027101	CG40478	Dual-specificity tyrosine phosphorylation-regulated kinase 3	Dyrk3	BDSC	55882	HMC04155	y[1] sc[*] v[1]; P{y[+t7.7] v[+t1.8]=TRiP.HMC04155}attP2	VALIUM20	3	attP2	N/A	None		Not Tested	Weak PN		Not Tested	This Study
FBgn0005640	CG10579	Ecdysone-induced protein 63E	Eip63E	BDSC	34075	HMS00569	y1 sc* v1; P{TRiP.HMS00569}attP2	VALIUM20	3	attP2	1	None		Not Tested	None		Not Tested	This Study
FBgn0025936	CG1511	Eph receptor tyrosine kinase	Eph	BDSC	39066	HMS01986	y1 sc* v1; P{TRiP.HMS01986}attP40	VALIUM20	2	attP40	0.69	Weak engulfment defects		Not Tested	None		Not Tested	This Study
FBgn0052703	CG32703	Extracellularly regulated kinase 7	Erk7	BDSC	36110	HMS00222	y1 sc* v1; P{TRiP.HMS00222}attP2	VALIUM20	3	attP2	N/A	None		Not Tested	None		Not Tested	This Study
FBgn0000723	CG8874	FER tyrosine kinase	FER	BDSC	33375	HMS00249	y1 sc* v1; P{TRiP.HMS00249}attP2	VALIUM20	3	attP2	0.25	None		Not Tested	None		Not Tested	This Study
FBgn0020440	CG10023	Focal adhesion kinase	Fak	BDSC	29323	JF02484	y1 v1; P{TRiP.JF02484}attP2	VALIUM10	3	attP2	N/A	None		Not Tested	None		Not Tested	This Study
FBgn0000721	CG10033	foraging	for	BDSC	31592	JF01181	y1 v1; P{TRiP.JF01181}attP2	VALIUM1	3	attP2	N/A	None		Yes	None		Yes	This Study
FBgn0000721	CG10033	foraging	for	BDSC	31698	JF01449	y1 v1; P{TRiP.JF01449}attP2/TM3, Ser1	VALIUM20	3	attP2	N/A	Weak engulfment defects		Yes	None		Yes	This Study
FBgn0000721	CG10033	foraging	for	BDSC	57041	HMS04486	y[1] sc[*] v[1] sev[21]; P{y[+t7.7] v[+t1.8]=TRiP.HMS04486}attP40	VALIUM20	2	attP40	0.06	None		Yes	Moderate PN	Round St 14 egg chambers	Yes
FBgn0000721	CG10033	foraging	for	Vienna	v38319	GD6843	w[1118]; P{GD6843}v38319	VALIUM1	3	attP2	N/A	Strong engulfment defects		Yes	Strong PN		Yes	This Study
FBgn0004373	CG7004	four wheel drive	fwd	BDSC	29396	JF03329	y1 v1; P{TRiP.JF03329}attP2	VALIUM10	3	attP2	N/A	None		Yes	None		Yes	This Study
FBgn0004373	CG7004	four wheel drive	fwd	BDSC	31187	JF01701	y1 v1; P{TRiP.JF01701}attP2	VALIUM1	3	attP2	N/A	None		Yes	None		Yes	This Study
FBgn0000658	CG10917	four-jointed	fj	BDSC	28009	JF02843	y1 v1; P{TRiP.JF02843}attP2/TM3, Sb1	VALIUM10	3	attP2	N/A	None		Yes	None		No	This Study
FBgn0000658	CG10917	four-jointed	fj	BDSC	34323	HMS01310	y1 sc* v1; P{TRiP.HMS01310}attP2	VALIUM20	3	attP2	0.71	None		Yes	Weak PN		No	This Study
FBgn0023083	CG7693	frayed	fray	BDSC	38327	HMS01794	y1 sc* v1; P{TRiP.HMS01794}attP2	VALIUM20	3	attP2	0.77	None		Not Tested	None		Not Tested	This Study
FBgn0011205	CG5725	fumble	fbl	BDSC	64596	HMC05631	y[1] sc[*] v[1]; P{y[+t7.7] v[+t1.8]=TRiP.HMC05631}attP40	VALIUM20	2	attP40	N/A	None		Not Tested	None		Not Tested	This Study
FBgn0001079	CG6551	fused	fu	BDSC	31043	JF01490	y1 v1; P{TRiP.JF01490}attP2	VALIUM1	3	attP2	N/A	None		Not Tested	None		Not Tested	This Study
FBgn0261988	CG17998	G protein-coupled receptor kinase 2	Gprk2	BDSC	34843	HMS00161	y1 sc* v1; P{TRiP.HMS00161}attP2	VALIUM20	3	attP2	N/A	Weak engulfment defects		Yes	Strong PN		Yes	Timmons, et al., 2016
FBgn0261988	CG17998	G protein-coupled receptor kinase 2	Gprk2	BDSC	57316	HMS04517	y[1] sc[*] v[1] sev[21]; P{y[+t7.7] v[+t1.8]=TRiP.HMS04517}attP40	VALIUM20	2	attP40	N/A	ND		Not Tested	None		No
FBgn0261988	CG17998	G protein-coupled receptor kinase 2	Gprk2	BDSC	41933	HMS02330	y1 v1; P{TRiP.HMS02330}attP40	VALIUM20	2	attP40	1	Weak engulfment defects		Yes	Weak PN		Yes	This Study
FBgn0266465	CG5169	Germinal centre kinase III	GckIII	BDSC	31744	HM04054	y1 v1; P{TRiP.HM04054}attP2/TM3, Sb1	VALIUM1	3	attP2	N/A	Weak engulfment defects		Not Tested	None		Not Tested	This Study
FBgn0250823	CG6963	gilgamesh	gish	BDSC	28066	JF02903	y1 v1; P{TRiP.JF02903}attP2	VALIUM10	3	attP2	N/A	None		Yes	None		Yes	This Study
FBgn0250823	CG6963	gilgamesh	gish	BDSC	36719	HMS01609	y1 sc* v1; P{TRiP.HMS01609}attP2	VALIUM20	3	attP2	0.26	None	A lot of death in stages 6-7	Yes	None		Yes	This Study
FBgn0261278	CG17161	grapes	grp	BDSC	27277	JF02588	y1 v1; P{TRiP.JF02588}attP2	VALIUM10	3	attP2	N/A	None		Yes	Weak PN		No	This Study
FBgn0261278	CG17161	grapes	grp	BDSC	36685	HMS01573	y1 sc* v1; P{TRiP.HMS01573}attP2	VALIUM20	3	attP2	0.8	None		Yes	None		No	This Study
FBgn0260399	CG7719	greatwall	gwl	BDSC	34525	HMS00834	y1 sc* v1; P{TRiP.HMS00834}attP2	VALIUM20	3	attP2	N/A	None		Not Tested	None		Not Tested	This Study
FBgn0263395	CG7097	happyhour	hppy	BDSC	53884	HMJ21199	y[1] v[1]; P{y[+t7.7] v[+t1.8]=TRiP.HMJ21199}attP40	VALIUM20	2	attP40	N/A	None		Not Tested	None		Not Tested	This Study
FBgn0010389	CG7223	heartless	htl	BDSC	35024	HMS01437	y1 sc* v1; P{TRiP.HMS01437}attP2	VALIUM20	3	attP2	0.51	None		Not Tested	None		Not Tested	This Study
FBgn0010303	CG4353	hemipterous	hep	BDSC	28710	JF03137	y1 v1; P{TRiP.JF03137}attP2	VALIUM10	3	attP2	N/A	None		Not Tested	None		Not Tested	This Study
FBgn0261456	CG11228	hippo	hpo	BDSC	27661	JF02740	y1 v1; P{TRiP.JF02740}attP2	VALIUM 10	3	attP2	N/A	Weak engulfment defects		Yes	ND		Not Tested	This Study
FBgn0261456	CG11228	hippo	hpo	BDSC	33614	HMS00006	y1 v1; P{TRiP.HMS00006}attP2	VALIUM20	3	attP2	0.24	Weak engulfment defects		Yes	ND		Not Tested	This Study
FBgn0004864	CG1594	hopscotch	hop	BDSC	32966	HMS00761	y1 sc* v1; P{TRiP.HMS00761}attP2	VALIUM20	3	attP2	N/A	None	No progression past stage 6-7	Not Tested	None	No progression past stage 6-7	Not Tested	This Study
FBgn0086657	CG2615	I-kappaB kinase ε	IKK𝜀	BDSC	34709	HMS01188	y1 sc* v1; P{TRiP.HMS01188}attP2	VALIUM20	3	attP2	0.5	None		Not Tested	None		Not Tested	This Study
FBgn0004784	CG6518	inactivation no afterpotential C	inaC	BDSC	36776	JF02391	y1 v1; P{TRiP.JF02391}attP2	VALIUM20	3	attP2	N/A	None		Yes	None		Yes	This Study
FBgn0004784	CG6518	inactivation no afterpotential C	inaC	BDSC	33768	JF02958	y1 v1; P{TRiP.JF02958}attP2/TM3, Sb1	VALIUM20	3	attP2	N/A	None		Yes	None		Yes	This Study
FBgn0032147	CG4026	Inositol 1,4,5-triphosphate kinase 1	IP3K1	BDSC	31733	HM04042	y1 v1; P{TRiP.HM04042}attP2/TM3, Sb1	VALIUM1	3	attP2	N/A	None		Not Tested	None		Not Tested	This Study
FBgn0283680	CG45017	Inositol 1,4,5-triphosphate kinase 2	IP3K2	BDSC	55240	HMC02364	y1 sc* v1; P{TRiP.HMC02364}attP2/TM3, Sb1	VALIUM20	3	attP2	N/A	None		Not Tested	None		Not Tested	This Study
FBgn0261984	CG4583	Inositol-requiring enzyme-1	Ire1	BDSC	36743	HMS03003	y1 sc* v1; P{TRiP.HMS03003}attP40	VALIUM20	2	attP40	0.43	None		Not Tested	None		Not Tested	This Study
FBgn0283499	CG18402	Insulin-like receptor	InR	BDSC	31037	JF01482	y1 v1; P{TRiP.JF01482}attP2	VALIUM1	3	attP2	N/A	None		Yes	ND		Not Tested	This Study
FBgn0283499	CG18402	Insulin-like receptor	InR	BDSC	31594	JF01183	y1 v1; P{TRiP.JF01183}attP2	VALIUM1	3	attP2	N/A	None		Yes	ND		Not Tested	This Study
FBgn0028427	CG10504	Integrin linked kinase	Ilk	BDSC	57308	HMS04509	y[1] sc[*] v[1]; P{y[+t7.7] v[+t1.8]=TRiP.HMS04509}attP40	VALIUM20	2	attP40	0.83	None		Not Tested	None		Not Tested	This Study
FBgn0020412	CG6297	JIL-1 kinase	JIL-1	BDSC	42571	HMJ02230	y1 v1; P{TRiP.HMJ02230}attP40	VALIUM20	2	attP40	1	None		Not Tested	Weak PN		Not Tested	This Study
FBgn0015402	CG2899	kinase suppressor of ras	ksr	BDSC	41598	GL01134	y[1] v[1]; P{y[+t7.7] v[+t1.8]=TRiP.GL01134}attP2	VALIUM22	3	attP2	0.13	Weak engulfment defects	Some undead, some degenerating late stage egg chambers, PN found in St 14s	No	Moderate PN	Excessive mid-stage death in conditioned flies	Yes
FBgn0015402	CG2899	kinase suppressor of ras	ksr	BDSC	32937	HMS00730	y1 sc* v1; P{TRiP.HMS00730}attP2	VALIUM20	3	attP2	0.63	None		No	Moderate PN	No DAs	Yes	This Study
FBgn0035639	CG5537	krishah	kri	BDSC	62238	HMC05245	y[1] sc[*] v[1]; P{y[+t7.7] v[+t1.8]=TRiP.HMC05245}attP40	VALIUM20	2	attP40	N/A	None		Not Tested	None		Not Tested	This Study
FBgn0027279	CG14616	lethal (1) G0196	l(1)G0196	BDSC	57520	HMC04835	y[1] sc[*] v[1]; P{y[+t7.7] v[+t1.8]=TRiP.HMC04835}attP40	VALIUM20	2	attP40	N/A	None		Not Tested	None		Not Tested	This Study
FBgn0022029	CG4798	lethal (2) k01209	l(2)k01209	BDSC	57219	HMC04602	y[1] sc[*] v[1]; P{y[+t7.7] v[+t1.8]=TRiP.HMC04602}attP40	VALIUM20	2	attP40	N/A	ND		Not Tested	None		Not Tested	This Study
FBgn0038816	CG5483	Leucine-rich repeat kinase	Lrrk	BDSC	39019	HMS01937	y1 v1; P{TRiP.HMS01937}attP40	VALIUM20	2	attP40	N/A	None		Yes	None		Yes	This Study
FBgn0038816	CG5483	Leucine-rich repeat kinase	Lrrk	BDSC	32457	HMS00456	y1 sc* v1; P{TRiP.HMS00456}attP2	VALIUM20	3	attP2	0.28	None		Yes	None		Yes	This Study
FBgn0261524	CG12244	licorne	lic	BDSC	31643	JF01433	y1 v1; P{TRiP.JF01433}attP2	VALIUM1	3	attP2	N/A	None		Not Tested	None		Not Tested	This Study
FBgn0283712	CG1848	LIM domain kinase 1	LIMK1	BDSC	42576	HMJ02235	y1 v1; P{TRiP.HMJ02235}attP40	VALIUM20	2	attP40	1	None		No	None		Yes	This Study
FBgn0283712	CG1848	LIM domain kinase 1	LIMK1	BDSC	26294	JF02063	y1 v1; P{TRiP.JF02063}attP2	VALIUM 10	3	attP40	N/A	Weak engulfment defects		No	None		Yes	This Study
FBgn0017581	CG17342	Lk6 kinase	Lk6	BDSC	28357	JF02993	y1 v1; P{TRiP.JF02993}attP2/TM3, Sb1	VALIUM10	3	attP2	N/A	None		Not Tested	Weak PN		Not Tested	This Study
FBgn0038167	CG9374	Lkb1 kinase	lkb1	BDSC	34362	HMS01351	y1 sc* v1; P{TRiP.HMS01351}attP2	VALIUM20	3	attP2	0.32	None		Not Tested	Weak PN		Not Tested	This Study
FBgn0013987	CG3086	MAP kinase activated protein-kinase-2	MAPk-Ak2	BDSC	57013	HMS04456	y[1] sc[*] v[1]; P{y[+t7.7] v[+t1.8]=TRiP.HMS04456}attP40	VALIUM20	2	attP40	0.12	ND		Not Tested	None		Not Tested	This Study
FBgn0024326	CG9738	MAP kinase kinase 4	Mkk4	BDSC	42832	HMS02524	y1 sc* v1; P{TRiP.HMS02524}attP40	VALIUM20	2	attP40	N/A	None		Not Tested	None		Not Tested	This Study
FBgn0004367	CG4252	meiotic 41	mei-41	BDSC	41934	HMS02331	y1 v1; P{TRiP.HMS02331}attP40	VALIUM20	2	attP40	0.22	Weak engulfment defects		Not Tested	Weak PN		Not Tested	This Study
FBgn0024329	CG7717	Mekk1	Mekk1	BDSC	28587	HM05075	y1 v1; P{TRiP.HM05075}attP2	VALIUM10	3	attP2	N/A	Strong engulfment defects		Not Tested	None		Not Tested	Etchegaray, et al., 2012
FBgn0031855	CG11221	meng-po	meng	BDSC	29603	JF03282	y1 v1; P{TRiP.JF03282}attP2	VALIUM10	3	attP2	N/A	None	Very round egg chambers.	Not Tested	None	Very round egg chambers. Short DAs.	Not Tested	This Study
FBgn0259168	CG42273	minibrain	mnb	BDSC	36657	HMS01545	y1 sc* v1; P{TRiP.HMS01545}attP40	VALIUM20	2	attP40	0.03	None		Yes	None		Yes	This Study
FBgn0259168	CG42273	minibrain	mnb	BDSC	28888	HM05098	y1 v1; P{TRiP.HM05098}attP2	VALIUM10	3	attP2	N/A	None		Yes	None		Yes	This Study
FBgn0010909	CG16973	misshapen	msn	BDSC	42518	HMJ02084	y1 v1; P{TRiP.HMJ02084}attP40	VALIUM20	2	attP40	0.05	None		Yes	Yes	No DAs. No progression past stage 10. NC nuclei condense and fragment before stage 10	No	This Study
FBgn0010909	CG16973	misshapen	msn	BDSC	28791	JF03219	y1 v1; P{TRiP.JF03219}attP2	VALIUM10	3	attP2	N/A	None	Egg chambers are very round.	Yes	None	Egg chambers are very round. Excessive mid-stage death when conditioned	No	This Study
FBgn0027497	CG1098	MLF1-adaptor molecule	Madm	BDSC	42529	HMJ02096	y1 v1; P{TRiP.HMJ02096}attP40	VALIUM20	2	attP40	N/A	None		Yes	None		No	This Study
FBgn0027497	CG1098	MLF1-adaptor molecule	Madm	BDSC	55883	HMC04156	y[1] v[1]; P{y[+t7.7] v[+t1.8]=TRiP.HMC04156}attP2/TM3, Sb[1]	VALIUM20	3	attP2	N/A	None		Yes	Moderate PN	Excessive mid-stage death in conditioned flies	Yes
FBgn0027497	CG1098	MLF1-adaptor molecule	Madm	BDSC	31644	JF01435	y1 v1; P{TRiP.JF01435}attP2	VALIUM1	3	attP2	N/A	None		Yes	Moderate PN	Some dumpless. DAs skinny and short.	Yes	This Study
FBgn0000063	CG7643	Monopolar spindle 1	Mps1	BDSC	36658	HMS01546	y[1] sc[*] v[1]; P{y[+t7.7] v[+t1.8]=TRiP.HMS01546}attP2/TM3, Sb[1]	VALIUM20	3	attP2	0.39	None		Not Tested	None		Not Tested	This Study
FBgn0033773	CG8767	Mos oncogene	Mos	BDSC	56857	HMS02467	y1 sc* v1; P{TRiP.HMS02467}attP40	VALIUM20	2	attP40	0.02	None		Not Tested	None		Not Tested	This Study
FBgn0260750	CG31873	Multi-substrate lipid kinase	Mulk	BDSC	33046	HMS00699	y1 sc* v1; P{TRiP.HMS00699}attP2	VALIUM20	3	attP2	N/A	None		Not Tested	None		Not Tested	This Study
FBgn0025743	CG18582	mushroom bodies tiny	mbt	BDSC	41713	HMS02278	y1 v1; P{TRiP.HMS02278}attP40	VALIUM20	2	attP40	0.93	None		Yes	None		Yes	This Study
FBgn0025743	CG18582	mushroom bodies tiny	mbt	BDSC	29379	JF03311	y1 v1; P{TRiP.JF03311}attP2	VALIUM10	3	attP2	N/A	None		Yes	None		Yes	This Study
FBgn0002938	CG5125	neither inactivation nor afterpotential C	ninaC	BDSC	27693	JF02773	y1 v1; P{TRiP.JF02773}attP2/TM3, Sb1	VALIUM10	3	attP2	N/A	None		Not Tested	None		Not Tested	This Study
FBgn0029970	CG17256	Nek2	Nek2	BDSC	57014	HMS04457	y1 sc* v1; P{TRiP.HMS04457}attP40	VALIUM20	2	attP40	0.04	None		Yes	None		Yes	This Study
FBgn0029970	CG17256	Nek2	Nek2	BDSC	28600	HM05088	y1 v1; P{TRiP.HM05088}attP2/TM3, Sb1	VALIUM10	3	attP2	N/A	None		Yes	None		Yes	This Study
FBgn0011817	CG7892	nemo	nmo	BDSC	25793	JF01799	y1 v1; P{TRiP.JF01799}attP2	VALIUM10	3	attP2	N/A	None		No	None		Yes	This Study
FBgn0011817	CG7892	nemo	nmo	Vienna	v3002	GD1495	w[1118]; P{GD1495}v3002	VALIUM20	2	attP40	N/A	Weak engulfment defects		Yes	None		Yes	This Study
FBgn0011817	CG7892	nemo	nmo	BDSC	42570	HMJ02229	w[1118]; P{GD1495}v3002	VALIUM20	2	attP40	0.69	Weak engulfment defects		Yes	None		Yes	This Study
FBgn0045980	CG10951	nimA-like kinase	niki	BDSC	42543	HMJ02114	y1 v1; P{TRiP.HMJ02114}attP40	VALIUM20	2	attP40	N/A	None		Yes	None		No	This Study
FBgn0045980	CG10951	nimA-like kinase	niki	BDSC	35735	HMS01477	y1 sc* v1; P{TRiP.HMS01477}attP2	VALIUM20	3	attP2	N/A	None		Yes	None	Excessive mid-stage death in conditioned flies	No	This Study
FBgn0263968	CG32743	no-on-and-no-off transient C	nonC	BDSC	41945	HMS02342	y1 v1; P{TRiP.HMS02342}attP40	VALIUM20	2	attP40	0.37	None		Not Tested	None		Not Tested	This Study
FBgn0262617	CG43143	Nuak1 ortholog	Nuak1	BDSC	31885	JF02162	y1 v1; P{TRiP.JF02162}attP2	VALIUM10	3	attP2	N/A	None		Not Tested	None		Not Tested	This Study
FBgn0015772	CG10637	Numb-associated kinase	Nak	BDSC	38326	HMS01793	y1 sc* v1; P{TRiP.HMS01793}attP2	VALIUM20	3	attP2	0.54	None		Not Tested	None		Not Tested	This Study
FBgn0004839	CG8967	off-track	otk	BDSC	25790	JF01796	y1 v1; P{TRiP.JF01796}attP2	VALIUM10	3	attP2	N/A	None		Not Tested	None		Not Tested	This Study
FBgn0267698	CG10295	p21-activated kinase	Pak	BDSC	28945	HM05156	y1 v1; P{TRiP.HM05156}attP2	VALIUM10	3	attP2	N/A	Weak engulfment defects		No	Weak PN		No	This Study
FBgn0267698	CG10295	p21-activated kinase	Pak	BDSC	41714	HMS02279	y1 v1; P{TRiP.HMS02279}attP40	VALIUM20	2	attP40	0.9	None		No	None		No	This Study
FBgn0015765	CG5475	p38a	p38a	BDSC	27316	JF02625	y1 v1; P{TRiP.JF02625}attP2	VALIUM10	3	attP2	N/A	None		Yes	None		Yes	This Study
FBgn0015765	CG5475	p38a	p38a	BDSC	34744	HMS01224	y1 sc* v1; P{TRiP.HMS01224}attP2	VALIUM20	3	attP2	N/A	None		Yes	None		Yes	This Study
FBgn0024846	CG7393	p38b MAP kinase	p38b	BDSC	29405	JF03341	y1 v1; P{TRiP.JF03341}attP2	VALIUM10	3	attP2	N/A	None		Not Tested	None		Not Tested	This Study
FBgn0044826	CG14895	Pak3	Pak3	BDSC	42664	HMS02500	y1 v1; P{TRiP.HMS02500}attP40	VALIUM20	2	attP40	N/A	None		Not Tested	None		Not Tested	This Study
FBgn0000826	CG11420	pan gu	png	BDSC	42535	HMJ02104	y1 v1; P{TRiP.HMJ02104}attP40	VALIUM20	2	attP40	0.01	None		Not Tested	None		Not Tested	This Study
FBgn0037327	CG2087	pancreatic eIF-2alpha kinase	PEK	BDSC	42499	HMJ02063	y1 v1; P{TRiP.HMJ02063}attP40	VALIUM20	2	attP40	0.15	None		Not Tested	None		Not Tested	This Study
FBgn0034950	CG3105	PAS kinase	Pask	BDSC	29581	JF03260	y1 v1; P{TRiP.JF03260}attP2	VALIUM10	3	attP2	N/A	None		Not Tested	None	A lot of extra tissue/NC nuclei accumulation	Not Tested	This Study
FBgn0032006	CG8222	PDGF- and VEGF-receptor related	Pvr	BDSC	37520	HMS01662	y1 sc* v1; P{TRiP.HMS01662}attP40	VALIUM20	2	attP40	N/A	Weak engulfment defects		Not Tested	None		Not Tested	This Study
FBgn0010441	CG5974	pelle	pll	BDSC	41935	HMS02332	y1 v1; P{TRiP.HMS02332}attP40	VALIUM20	2	attP40	N/A	None		No	None		No	This Study
FBgn0010441	CG5974	pelle	pll	BDSC	57015	HMS04458	y1 sc* v1; P{TRiP.HMS04458}attP40	VALIUM20	2	attP2	0.02	Weak engulfment defects	Egg chambers are mis-shapened. Premature FC death after stage 7.	No	Weak PN	Egg chambers are mis-shapened. Short DAs. Premature FC death after stage 7. Egg chambers have floating NC nuclei	No	This Study
FBgn0003071	CG4001	Phosphofructokinase	Pfk	BDSC	34336	HMS01324	y1 sc* v1; P{TRiP.HMS01324}attP2	VALIUM20	3	attP2	N/A	None		Not Tested	None		Not Tested	This Study
FBgn0250906	CG3127	Phosphoglycerate kinase	Pgk	BDSC	33633	HMS00031	y1 v1; P{TRiP.HMS00031}attP2/TM3, Sb1	VALIUM20	3	attP2	N/A	None		Yes	None		No	This Study
FBgn0250906	CG3127	Phosphoglycerate kinase	Pgk	BDSC	28053	JF02889	y1 v1; P{TRiP.JF02889}attP2/TM3, Sb1	VALIUM10	3	attP2	N/A	None		Yes	None		No	This Study
FBgn0250906	CG3127	Phosphoglycerate kinase	Pgk	BDSC	33632	HMS00030	y1 v1; P{TRiP.HMS00030}attP2	VALIUM20	3	attP2	N/A	None		Yes	Very strong PN	Excessive mid-stage dying in conditioned flies. A lot of extra tissue/NC nuclei accumulation at posterior end of egg chambers.	No	This Study
FBgn0020386	CG1210	Phosphoinositide-dependent kinase 1	Pdk1	BDSC	27725	JF02807	y1 v1; P{TRiP.JF02807}attP2	VALIUM10	3	attP2	N/A	None		Yes	None	Conditioned flies had excessive amount of dying mid-stage egg chambers. Short DAs. Chorion have wrinkled, crushed appearance. A lot of extra DAs and tissue at oviduct.	No	This Study
FBgn0020386	CG1210	Phosphoinositide-dependent kinase 1	Pdk1	BDSC	34936	HMS01250	y1 sc* v1; P{TRiP.HMS01250}attP2	VALIUM20	3	attP2	1	None		Yes	None		No	This Study
FBgn0011754	CG1830	Phosphorylase kinase gamma	PhKgamma	BDSC	42500	HMJ02065	y1 v1; P{TRiP.HMJ02065}attP40	VALIUM20	2	attP40	1	None		Not Tested	None	a lot of extra tissue/NC nuclei accumulation	Not Tested	This Study
FBgn0015277	CG5373	Phosphotidylinositol 3 kinase 59F	Pi3K59F	BDSC	64011	HMJ30324	y[1] v[1]; P{y[+t7.7] v[+t1.8]=TRiP.HMJ30324}attP40	VALIUM20	2	attP40	N/A	Weak engulfment defects	Degeneration of late stage egg chambers with NC floating in the oocyte and PN	No	Very strong PN	Excessive mid-stage death in conditioned flies, degenerating late stage NC nuclei, lots of post-14 egg chambers, abnormal DAs.	Yes
FBgn0015277	CG5373	Phosphotidylinositol 3 kinase 59F	Pi3K59F	BDSC	33384	HMS00261	y1 sc* v1; P{TRiP.HMS00261}attP2/TM3, Sb1	VALIUM20	3	attP2	N/A	None		No	Strong PN		Yes	This Study
FBgn0015278	CG11621	Phosphotidylinositol 3 kinase 68D	Pi3K68D	BDSC	34621	HMS01296	y1 sc* v1; P{TRiP.HMS01296}attP2	VALIUM20	3	attP2	N/A	None		No	None		No	This Study
FBgn0015278	CG11621	Phosphotidylinositol 3 kinase 68D	Pi3K68D	BDSC	31252	JF01193	y1 v1; P{TRiP.JF01193}attP2	VALIUM1	3	attP2	N/A	Weak engulfment defects		NO	Strong PN		No	This Study
FBgn0015279	CG4141	Pi3K92E	Pi3K92E	BDSC	8288	N/A	y[1] w[1118]; P{w[+mC]=UAS-Pi3K92E.A2860C}1	N/A	1	N/A	N/A	Weak engulfment defects		No	Weak PN		No
FBgn0015279	CG4141	Pi3K92E	Pi3K92E	BDSC	8289	N/A	y[1] w[1118]; P{w[+mC]=UAS-Pi3K92E.A2860C}3	N/A	3	N/A	N/A	None		No	None		No
FBgn0015279	CG4141	Pi3K92E	Pi3K92E	BDSC	27690	JF02770	y1 v1; P{TRiP.JF02770}attP2/TM3, Sb1	VALIUM10	3	attP2	N/A	Delayed engulfment		No	None	Excessive mid-stage death in conditioned flies	No	This Study
FBgn0015279	CG4141	Pi3K92E	Pi3K92E	BDSC	61182	HMC05152	y1 sc* v1; P{TRiP.HMC05152}attP40	VALIUM20	2	attP40	N/A	None		No	None		No	This Study
FBgn0016696	CG4268	Pitslre	Pitslre	BDSC	56855	HMS02389	y1 sc* v1; P{TRiP.HMS02389}attP40	VALIUM20	2	attP40	N/A	None		Not Tested	None		Not Tested	This Study
FBgn0003124	CG12306	polo	polo	BDSC	36702	HMS01591	y1 sc* v1; P{TRiP.HMS01591}attP2/TM3, Sb1	VALIUM20	3	attP2	N/A	None		Not Tested	None		Not Tested	This Study
FBgn0003124	CG12306	polo	polo	BDSC	33042	HMS00530	y1 sc* v1; P{TRiP.HMS00530}attP2	VALIUM20	3	attP2	N/A	lethal		Not Tested	lethal		Not Tested	This Study
FBgn0262614	CG43140	polychaetoid	pyd	BDSC	28920	HM05131	y1 v1; P{TRiP.HM05131}attP2	VALIUM10	3	attP2	N/A	None		Yes	None		Yes	This Study
FBgn0262614	CG43140	polychaetoid	pyd	BDSC	33386	HMS00263	y1 sc* v1; P{TRiP.HMS00263}attP2	VALIUM20	3	attP2	N/A	None		Yes	None		Yes	This Study
FBgn0003091	CG6622	Protein C kinase 53E	Pkc53E	BDSC	27491	JF02641	y1 v1; P{TRiP.JF02641}attP2	VALIUM10	3	attP2	N/A	None		Yes	None		No	This Study
FBgn0003091	CG6622	Protein C kinase 53E	Pkc53E	BDSC	55864	HMC04134	y[1] sc[*] v[1] sev[21]; P{y[+t7.7] v[+t1.8]=TRiP.HMC04134}attP2	VALIUM20	3	attP2	N/A	None		Yes	Weak PN		No
FBgn0003091	CG6622	Protein C kinase 53E	Pkc53E	BDSC	34716	HMS01195	y1 sc* v1; P{TRiP.HMS01195}attP2	VALIUM20	3	attP2	N/A	None		Yes	None	Excessive mid-stage death in conditioned flies	No	This Study
FBgn0003093	CG1954	Protein C kinase 98E	Pkc98E	BDSC	29311	JF02470	y1 v1; P{TRiP.JF02470}attP2	VALIUM10	3	attP2	N/A	None		Not Tested	None		Not Tested	This Study
FBgn0259680	CG42349	Protein kinase C delta	Pkcdelta	BDSC	28355	JF02991	y1 v1; P{TRiP.JF02991}attP2	VALIUM10	3	attP2	N/A	None		Not Tested	None		Not Tested	This Study
FBgn0038603	CG7125	Protein Kinase D	PKD	BDSC	55898	HMC04179	y[1] v[1]; P{y[+t7.7] v[+t1.8]=TRiP.HMC04179}attP2/TM3, Sb[1]	VALIUM20	3	attP2	N/A	ND		Not Tested	Weak PN		No
FBgn0038603	CG7125	Protein Kinase D	PKD	BDSC	28717	JF03144	y1 v1; P{TRiP.JF03144}attP2	VALIUM10	3	attP2	N/A	None		Not Tested	None	Excessive mid-stage death in conditioned flies	No	This Study
FBgn0020621	CG2049	Protein kinase N	Pkn	BDSC	28335	JF02970	y1 v1; P{TRiP.JF02970}attP2	VALIUM10	3	attP2	N/A	None		No	None	Excessive mid-stage death in conditioned flies	No	This Study
FBgn0020621	CG2049	Protein kinase N	Pkn	BDSC	42567	HMJ02226	y[1] v[1]; P{y[+t7.7] v[+t1.8]=TRiP.HMJ02226}attP40	VALIUM20	2	attP40	0.48	ND		Not Tested	Weak PN		Yes
FBgn0020621	CG2049	Protein kinase N	Pkn	BDSC	57804	HMJ21812	y[1] v[1]; P{y[+t7.7] v[+t1.8]=TRiP.HMJ21812}attP40/CyO	VALIUM20	2	attP40	N/A	Weak engulfment defects		No	Weak PN		Yes
FBgn0020621	CG2049	Protein kinase N	Pkn	BDSC	55876	HMC04149	y1 sc* v1; P{TRiP.HMC04149}attP2	VALIUM20	3	attP2	N/A	None		No	None		No	This Study
FBgn0000273	CG4379	Protein kinase, cAMP-dependent, catalytic subunit 1	Pka-C1	BDSC	57743	HMC04936	y1 sc* v1; P{TRiP.HMC04936}attP40	Valium20	3	attP2	N/A	None		Not Tested	None		Not Tested	This Study
FBgn0000274	CG12066	Protein kinase, cAMP-dependent, catalytic subunit 2	Pka-C2	BDSC	55859	HMC04129	y1 sc* v1; P{TRiP.HMC04129}attP2	VALIUM20	3	attP2	N/A	None		Not Tested	None		Not Tested	This Study
FBgn0000489	CG6117	Protein kinase, cAMP-dependent, catalytic subunit 3	Pka-C3	BDSC	39050	HMS01970	y1 sc* v1; P{TRiP.HMS01970}attP2	VALIUM20	3	attP2	0.35	None		Yes	None		Yes	This Study
FBgn0000489	CG6117	Protein kinase, cAMP-dependent, catalytic subunit 3	Pka-C3	BDSC	27569	JF02723	y1 v1; P{TRiP.JF02723}attP2	VALIUM10	3	attP2	N/A	None		Yes	None		Yes	This Study
FBgn0000442	CG3324	Protein kinase, cGMP-dependent at 21D	Pkg21D	BDSC	27686	JF02766	y1 v1; P{TRiP.JF02766}attP2	VALIUM10	3	attP2	N/A	None		Not Tested	None		Not Tested	This Study
FBgn0029891	CG4523	PTEN-induced putative kinase 1	Pink1	BDSC	41671	HMS02204	y1 sc* v1; P{TRiP.HMS02204}attP2	VALIUM20	3	attP2	0.74	None		Not Tested	None		Not Tested	This Study
FBgn0003169	CG7904	punt	put	BDSC	27514	JF02664	y1 v1; P{TRiP.JF02664}attP2	VALIUM10	3	attP2	N/A	None		Yes	None	Excessive mid-stage death in conditioned flies	No	This Study
FBgn0003169	CG7904	punt	put	BDSC	83650	N/A	y[1] w[*]; P{w[+mC]=UAS-put.KR.myc}5M/CyO	N/A	2	N/A	N/A	None		Yes	None		No
FBgn0003169	CG7904	punt	put	BDSC	39025	HMS01944	y1 sc* v1; P{TRiP.HMS01944}attP40	VALIUM20	2	attP40	N/A	None		Yes	None		No	This Study
FBgn0017558	CG8808	Pyruvate dehydrogenase kinase	Pdk	BDSC	28635	JF03050	y1 v1; P{TRiP.JF03050}attP2	VALIUM10	3	attP2	N/A	None		Not Tested	None		Not Tested	This Study
FBgn0003079	CG2845	Raf oncogene	Raf	BDSC	31038	JF01483	y1 v1; P{TRiP.JF01483}attP2	VALIUM1	3	attP2	N/A	None		Yes	None		No	This Study
FBgn0003079	CG2845	Raf oncogene	Raf	BDSC	31596	JF01185	y1 v1; P{TRiP.JF01185}attP2	VALIUM1	3	attP2	N/A	None		Yes	None	Excessive mid-stage death in conditioned flies	No	This Study
FBgn0003079	CG2845	Raf oncogene	Raf	BDSC	55863	HMC04133	y[1] v[1]; P{y[+t7.7] v[+t1.8]=TRiP.HMC04133}attP2	VALIUM20	3	attP2	N/A	None		Yes	Moderate PN	NC nuclei degenerating to appear to have more than 15 NCs	Yes
FBgn0003079	CG2845	Raf oncogene	Raf	BDSC	55679	HMC03854	y[1] sc[*] v[1]; P{y[+t7.7] v[+t1.8]=TRiP.HMC03854}attP2	VALIUM20	3	attP2	N/A	None		Yes	Weak PN		Yes	This Study
FBgn0011829	CG14396	Ret oncogene	Ret	BDSC	55872	HMC04143	y1 v1; P{TRiP.HMC04143}attP2	VALIUM20	2	attP2	N/A	None		Yes	None		Yes	This Study
FBgn0011829	CG14396	Ret oncogene	Ret	BDSC	50700	HMC03102	y1 v1; P{TRiP.HMC03102}attP40	VALIUM20	2	attP40	N/A	None		Yes	None		Yes	This Study
FBgn0261549	CG42667	retinal degeneration A	rdgA	BDSC	29435	JF03371	y1 v1; P{TRiP.JF03371}attP2	VALIUM10	3	attP2	N/A	None		Not Tested	None		Not Tested	This Study
FBgn026181	CG9774	Rho kinase	Rok	BDSC	28797	JF03225	y1 v1; P{TRiP.JF03225}attP2	VALIUM10	3	attP2	N/A	Engulfment defects		No	Moderate PN	Short DAs	Yes	This Study
FBgn026181	CG9774	Rho kinase	Rok	BDSC	34324	HMS01311	y1 sc* v1; P{TRiP.HMS01311}attP2	VALIUM20	3	attP2	0.34	None		No	Weak PN		Yes	This Study
FBgn0283472	CG10539	Ribosomal protein S6 kinase	S6k	BDSC	57016	HMS04459	y1 sc* v1; P{TRiP.HMS04459}attP40	VALIUM20	2	attP40	0.05	Weak engulfment defects		Not Tested	None	Skinny DAs	Not Tested	This Study
FBgn0262866	CG17596	Ribosomal protein S6 kinase II	S6kII	BDSC	27731	JF02814	y1 v1; P{TRiP.JF02814}attP2/TM3, Sb1	VALIUM10	3	attP2	N/A	None		Not Tested	None		Not Tested	This Study
FBgn0036187	CG11660	RIO kinase 1	RIOK1	BDSC	57150	HMC04524	y[1] sc[*] v[1]; P{y[+t7.7] v[+t1.8]=TRiP.HMC04524}attP40	VALIUM20	2	attP40	N/A	Engulfment defects	Undead	Not Tested	ND		Not Tested	This Study
FBgn0003256	CG12559	rolled	rl	BDSC	31387	JF01366	y[1] v[1]; P{y[+t7.7] v[+t1.8]=TRiP.JF01366}attP2	VALIUM1	3	attP2	N/A	None		Yes	Weak PN	NC nuclei degenerating to appear to have more than 15 NCs	Yes
FBgn0003256	CG12559	rolled	rl	BDSC	31524	JF01080	y[1] v[1]; P{y[+t7.7] v[+t1.8]=TRiP.JF01080}attP2	VALIUM1	3	attP2	N/A	None		Yes	Moderate PN		Yes
FBgn0003256	CG12559	rolled	rl	BDSC	34855	HMS00173	y1 sc* v1; P{TRiP.HMS00173}attP2	VALIUM20	3	attP2	0.16	None		Yes	Moderate PN	No DAs	Yes	This Study
FBgn0086906	CG1915	sallimus	sls	BDSC	31538	JF01098	y1 v1; P{TRiP.JF01098}attP2	VALIUM1	3	attP2	N/A	None		Yes	None		Yes	This Study
FBgn0086906	CG1915	sallimus	sls	BDSC	31539	JF01099	y1 v1; P{TRiP.JF01099}attP2	VALIUM1	3	attP2	N/A	None		Yes	None		Yes	This Study
FBgn0262103	CG42856	Salt-inducible kinase 3	Sik3	BDSC	28366	JF03002	y1 v1; P{TRiP.JF03002}attP2	VALIUM10	3	attP2	N/A	None		Yes	None		Yes	This Study
FBgn0262103	CG42856	Salt-inducible kinase 3	Sik3	BDSC	56941	HM04380	y1 sc* v1; P{TRiP.HMC04380}attP2	VALIUM20	3	attP2	N/A	None		Yes	None		Yes	This Study
FBgn0003317	CG1891	saxophone	sax	BDSC	36131	JF03431	y1 v1; P{TRiP.JF03431}attP2	VALIUM10	3	attP2	N/A	None		Yes	None		Yes	This Study
FBgn0003317	CG1891	saxophone	sax	BDSC	57319	HMS04520	y1 sc* v1; P{TRiP.HMS04520}attP40	VALIUM20	2	attP40	0.15	None		Yes	None		Yes	This Study
FBgn0038279	CG3837	Secreted decoy of InR	Sdr	BDSC	42609	HMS02444	y[1] v[1]; P{y[+t7.7] v[+t1.8]=TRiP.HMS02444}attP40	VALIUM20	2	attP40	N/A	None		No	Moderate PN		No
FBgn0038279	CG3837	Secreted decoy of InR	Sdr	Vienna	v44575	GD5662	w[1118]; P{GD5662}v44575/TM3	VALIUM20	2	attP40	N/A	Engulfment defects	Stage 9 egg chambers have severe defects while mid-stage (6-8) have mixed defects.	No	None	Excessive mid-stage death in conditioned flies.	No	This Study
FBgn0003366	CG18085	sevenless	sev	BDSC	55866	HMC04136	y1 v1; P{TRiP.HMC04136}attP2	VALIUM20	3	attP2	N/A	None		Not Tested	None		Not Tested	This Study
FBgn0015295	CG18247	SH2 ankyrin repeat kinase	Shark	BDSC	57017	HMS04460	y1 sc* v1; P{TRiP.HMS04460}attP2	VALIUM20	3	attP2	0.15	Engulfment defects		Yes	Very strong PN		Yes	This Study
FBgn0015295	CG18247	SH2 ankyrin repeat kinase	Shark	BDSC	25788	JF01794	y1 v1; P{TRiP.JF01794}attP2	VALIUM10	3	attP2	N/A	Engulfment defects		Yes	Very strong PN		Yes	Etchegaray, et al., 2012
FBgn0003371	CG2621	shaggy	sgg	BDSC	31308	JF01255	y1 v1; P{TRiP.JF01255}attP2	VALIUM1	3	attP2	N/A	None		Yes	None		No	This Study
FBgn0003371	CG2621	shaggy	sgg	BDSC	31309	JF01256	y1 v1; P{TRiP.JF01256}attP2/TM3, Ser1	VALIUM1	3	attP2	N/A	None		Yes	None		No	This Study
FBgn0016984	CG9985	skittles	sktl	BDSC	27715	JF02796	y1 v1; P{TRiP.JF02796}attP2/TM3, Sb1	VALIUM10	3	attP2	N/A	Engulfment defects		Not Tested	Very strong PN	Dumpless, Excessive mid-stage death in conditioned flies	Not Tested	This Study
FBgn0030018	CG2272	slipper	slpr	BDSC	32948	HMS00742	y1 sc* v1; P{TRiP.HMS00742}attP2	VALIUM20	3	attP2	0.43	Engulfment defects		Not Tested	None		Not Tested	Etchegaray, et al., 2012
FBgn0264087	CG43756	Slowpoke binding protein	Slob	BDSC	27492	JF02642	y1 v1; P{TRiP.JF02642}attP2	VALIUM10	3	attP2	N/A	None		Yes	None		Yes	This Study
FBgn0264087	CG43756	Slowpoke binding protein	Slob	BDSC	55879	HMC04152	y1 v1; P{TRiP.HMC04152}attP2	VALIUM20	3	attP2	N/A	None		Yes	None		Yes	This Study
FBgn0264357	CG17299	SNF4/AMP-activated protein kinase gamma subunit	SNF4Agamma	BDSC	26291	JF02060	y1 v1; P{TRiP.JF02060}attP2	VALIUM10	3	attP2	N/A	Engulfment defects	Premature FC death w/o membrane, undead	No	Strong PN		No	This Study
FBgn0264357	CG17299	SNF4/AMP-activated protein kinase gamma subunit	SNF4Agamma	BDSC	34726	HMS01205	y1 sc* v1; P{TRiP.HMS01205}attP2	VALIUM20	3	attP2	0.68	None		No	None		No	This Study
FBgn0030300	CG1747	Sphingosine kinase 1	Sk1	BDSC	36747	HMS03007	y1 sc* v1; P{TRiP.HMS03007}attP2/TM3, Sb1	VALIUM20	3	attP2	N/A	None		Not Tested	None		Not Tested	This Study
FBgn0286813	CG8174	SR Protein Kinase	SRPK	BDSC	57587	HMS04507	y[1] sc[*] v[1]; P{y[+t7.7] v[+t1.8]=TRiP.HMS04507}attP40	VALIUM20	2	attP40	0.05	ND		Not Tested	None		Not Tested	This Study
FBgn0264959	CG44128	Src oncogene at 42A	Src42A	BDSC	44039	HMS02755	y[1] sc[*] v[1] sev[21]; P{y[+t7.7] v[+t1.8]=TRiP.HMS02755}attP40	VALIUM20	2	attP40	0.18	Weak engulfment defects		Not Tested	ND		Not Tested
FBgn0261873	CG32717	stardust	sdt	BDSC	33909	HMS00851	y1 sc* v1; P{TRiP.HMS00851}attP2	VALIUM20	3	attP2	N/A	None		Yes	None		Yes	This Study
FBgn0261873	CG32717	stardust	sdt	BDSC	33991	HMS00953	y1 sc* v1; P{TRiP.HMS00953}attP2	VALIUM20	3	attP2	N/A	None		Yes	None	Skinny DAs. Chorion and DAs had "bumpy" texture	No	This Study
FBgn0261873	CG32717	stardust	sdt	BDSC	37510	HMS01652	y1 sc* v1; P{TRiP.HMS01652}attP40	VALIUM20	2	attP40	N/A	None		Yes	None		Yes	This Study
FBgn0046692	CG40293	Ste20-like kinase	Stlk	BDSC	27305	JF02614	y1 v1; P{TRiP.JF02614}attP2	VALIUM10	3	attP2	N/A	None		Yes	Moderate PN		No	This Study
FBgn0046692	CG40293	Ste20-like kinase	Stlk	BDSC	34620	HMS01295	y1 sc* v1; P{TRiP.HMS01295}attP2/TM3, Sb1	VALIUM20	3	attP2	0.29	None		Yes	None		No	This Study
FBgn0035001	CG4527	Sterile20-like kinase	Slik	BDSC	55626	HMC03770	y[1] sc[*] v[1]; P{y[+t7.7] v[+t1.8]=TRiP.HMC03770}attP40	VALIUM20	2	attP40	N/A	Weak engulfment defects		Not Tested	None		Not Tested	This Study
FBgn0002466	CG10522	sticky	sti	BDSC	53357	HMC03586	y[1] sc[*] v[1]; P{y[+t7.7] v[+t1.8]=TRiP.HMC03586}attP40	VALIUM20	2	attP40	N/A	None	2 engulfment defective egg chambers	Not Tested	Weak PN		Not Tested	This Study
FBgn0036544	CG6114	sugar-free frosting	sff	BDSC	36656	HMS01280	y1 sc* v1; P{TRiP.HMS01280}attP2	VALIUM20	3	attP2	N/A	None		Not Tested	None		Not Tested	This Study
FBgn0046689	CG31421	Tak1-like 1	Takl1	BDSC	55903	HM04186	y1 sc* v1; P{TRiP.HMC04186}attP2	VALIUM20	3	attP2	N/A	None		Not Tested	None		Not Tested	This Study
FBgn0031030	CG14217	Tao	Tao	BDSC	34881	HMS01226	y1 sc* v1; P{TRiP.HMS01226}attP2	VALIUM20	3	attP2	N/A	None		Not Tested	None		No	This Study
FBgn0031030	CG14217	Tao	Tao	BDSC	41936	HMS02333	y1 v1; P{TRiP.HMS02333}attP40	VALIUM20	2	attP40	N/A	ND		Not Tested	Weak PN		No	This Study
FBgn0010355	CG17603	TBP-associated factor 1	Taf1	BDSC	32421	HMS00416	y1 sc* v1; P{TRiP.HMS00416}attP2	VALIUM20	3	attP2	N/A	Engulfment defects	Undead after stage 6/7. Egg chambers lose FCs. NC nuclei are floating in the egg chambers. Some NC nuclei have condensed.	Not Tested	Yes	Egg chambers lose FCs. NC nuclei are floating in the egg chambers. Some NC nuclei have condensed	Not Tested	This Study
FBgn0045035	CG6535	telomere fusion	tefu	BDSC	31635	JF01422	y[1] v[1]; P{y[+t7.7] v[+t1.8]=TRiP.JF01422}attP2	VALIUM1	3	attP2	N/A	None		Yes	Weak PN		Yes
FBgn0045035	CG6535	telomere fusion	tefu	BDSC	44073	HMS02790	y1 sc* v1; P{TRiP.HMS02790}attP40	VALIUM20	2	attP40	0.24	None		Yes	Very strong PN	Short DAs	Yes	This Study
FBgn0026323	CG18492	TGF-beta activated kinase 1	Tak1	BDSC	33404	HMS00282	y1 sc* v1; P{TRiP.HMS00282}attP2	VALIUM20	3	attP2	0.54	None		Yes	None		Yes	This Study
FBgn0026323	CG18492	TGF-beta activated kinase 1	Tak1	BDSC	31394	JF01384	y1 v1; P{TRiP.JF01384}attP2/TM3, Ser1	VALIUM1	3	attP2	N/A	None		Yes	None		Yes	This Study
FBgn0026323	CG18492	TGF-beta activated kinase 1	Tak1	BDSC	31045	JF01492	y1 v1; P{TRiP.JF01492}attP2/TM3, Ser1	VALIUM1	3	attP2	N/A	None		Yes	None		Yes	This Study
FBgn0003716	CG14026	thickveins	tkv	BDSC	31040	JF01485	y[1] v[1]; P{y[+t7.7] v[+t1.8]=TRiP.JF01485}attP2/TM3, Ser[1]	VALIUM1	3	attP2	N/A	Strong engulfment defects	undead	Yes	Moderate PN		Yes
FBgn0003716	CG14026	thickveins	tkv	BDSC	31041	JF01486	y[1] v[1]; P{y[+t7.7] v[+t1.8]=TRiP.JF01486}attP2	VALIUM1	3	attP2	N/A	None		Yes	Moderate PN		Yes
FBgn0003716	CG14026	thickveins	tkv	BDSC	57303	HMS04501	y[1] sc[*] v[1] sev[21]; P{y[+t7.7] v[+t1.8]=TRiP.HMS04501}attP40	VALIUM20	2	attP40	N/A	None	Undead, degenerating late stage egg chambers	Yes	Strong PN		Yes
FBgn0003716	CG14026	thickveins	tkv	BDSC	40937	HMS02185	y1 v1; P{TRiP.HMS02185}attP40	VALIUM20	2	attP40	0.21	None		Yes	None	Excessive mid-stage death in conditioned flies	No	This Study
FBgn0003733	CG1389	torso	tor	BDSC	33627	HMS00021	y1 v1; P{TRiP.HMS00021}attP2	VALIUM20	3	attP2	0.24	None		Not Tested	None		Not Tested	This Study
FBgn0283657	CG34412	Tousled-like kinase	Tlk	BDSC	36102	HM05272	y1 sc* v1; P{TRiP.HM05272}attP2	VALIUM10	3	attP2	N/A	None		Not Tested	Strong PN		Not Tested	This Study
FBgn0283657	CG34412	Tousled-like kinase	Tlk	BDSC	33983	HMS00943	y1 sc* v1; P{TRiP.HMS00943}attP2	VALIUM20	3	attP2	N/A	lethal		Not Tested	lethal		Not Tested	This Study
FBgn0028978	CG5408	tribbles	trbl	BDSC	60007	HMS04999	y1 v1; P{TRiP.HMS04999}attP40	VALIUM20	2	attP40	N/A	None		Not Tested	None		Not Tested	This Study
FBgn0003744	CG8637	tricornered	trc	BDSC	28326	JF02961	y1 v1; P{TRiP.JF02961}attP2	VALIUM10	3	attP2	N/A	Weak engulfment defects		Not Tested	None		Not Tested	This Study
FBgn0260935	CG9746	Vacuolar protein sorting 15	Vps15	BDSC	57011	HMS04454	y[1] sc[*] v[1] sev[21]; P{y[+t7.7] v[+t1.8]=TRiP.HMS04454}attP40	VALIUM20	2	attP40	0.3	None		No	Moderate PN		Yes
FBgn0260935	CG9746	Vacuolar protein sorting 15	Vps15	BDSC	34092	HMS00908	y1 sc* v1; P{TRiP.HMS00908}attP2	VALIUM20	3	attP2	0.48	Weak engulfment defects		No	Strong PN	Excessive mid-stage death in conditioned flies	Yes	This Study
FBgn0250785	CG9326	varicose	vari	BDSC	28599	HM05087	y1 v1; P{TRiP.HM05087}attP2/TM3, Sb1	VALIUM10	3	attP2	N/A	None	Some egg chambers with 15+ NC.	Not Tested	None	In conditioned flies, some undead. Some egg chambers with 15+ NC.	Not Tested	This Study
FBgn0036896	CG8789	wallenda	wnd	BDSC	27525	JF02675	y1 v1; P{TRiP.JF02675}attP2	VALIUM10	3	attP2	N/A	None		Not Tested	None		Not Tested	This Study
FBgn0011739	CG12072	warts	wts	BDSC	27662	JF02741	y1 v1; P{TRiP.JF02741}attP2	VALIUM10	3	attP2	N/A	None		Yes	None		Yes	This Study
FBgn0011739	CG12072	warts	wts	BDSC	34064	HMS00026	y1 v1; P{TRiP.HMS00026}attP2	VALIUM20	3	attP2	0.67	None		Yes	None		Yes	This Study
FBgn0024179	CG10776	wishful thinking	wit	BDSC	25949	JF01969	y1 v1; P{TRiP.JF01969}attP2	VALIUM10	3	attP2	N/A	None		Yes	None		No	This Study
FBgn0024179	CG10776	wishful thinking	wit	BDSC	41906	HMS02298	y1 sc* v1; P{TRiP.HMS02298}attP2	VALIUM20	3	attP2	N/A	None		Yes	None	Excessive mid-stage death in conditioned flies	No	This Study
FBgn0037098	CG7177	Wnk kinase	Wnk	BDSC	62150	HMC05157	y[1] sc[*] v[1] sev[21]; P{y[+t7.7] v[+t1.8]=TRiP.HMC05157}attP40	VALIUM20	2	attP40	N/A	ND		Not Tested	Strong PN	Dumpless, some mid-stage death in conditioned flies, some partially undead mid-stage egg chambers	Yes
FBgn0037098	CG7177	Wnk kinase	Wnk	BDSC	42521	HMJ02087	y1 v1; P{TRiP.HMJ02087}attP40	VALIUM20	2	attP40	0.31	None		Not Tested	Very strong PN	Dumpless. Short DAs	Yes	This Study
FBgn0046685	CG31127	Wsck	Wsck	BDSC	42628	HMS02463	y1 sc* v1; P{TRiP.HMS02463}attP40	VALIUM20	2	attP40	N/A	None		Not Tested	None		Not Tested	This Study
FBgn0260990	CG1973	yata	yata	BDSC	34100	HMS01005	y[1] sc[*] v[1]; P{y[+t7.7] v[+t1.8]=TRiP.HMS01005}attP2/TM3, Sb[1]	VALIUM20	3	attP2	0.29	None		Not Tested	None		Not Tested	This Study
